1 **Broadly neutralizing plasma antibodies effective against diverse autologous circulating viruses in**  
2 **infants with multivariant HIV-1 infection.**

3 Nitesh Mishra<sup>1†</sup>, Shaifali Sharma<sup>1†</sup>, Ayushman Dobhal<sup>1†</sup>, Sanjeev Kumar<sup>1‡</sup>, Himanshi Chawla<sup>1§</sup>,  
4 Ravinder Singh<sup>2</sup>, Muzamil Ashraf Makhdoomi<sup>1||</sup>, Bimal Kumar Das<sup>2</sup>, Rakesh Lodha<sup>3</sup>, Sushil Kumar  
5 Kabra<sup>3</sup>, Kalpana Luthra<sup>1\*</sup>.

6 <sup>1</sup>Department of Biochemistry, All India Institute of Medical Sciences, New Delhi, India – 110029.

7 <sup>2</sup>Department of Microbiology, All India Institute of Medical Sciences, New Delhi, India – 110029.

8 <sup>3</sup>Department of Pediatrics, All India Institute of Medical Sciences, New Delhi, India – 110029.

9 <sup>†</sup>These authors contributed equally to this work.

10 <sup>‡</sup>Current Address – International Centre for Genetic Engineering and Biotechnology, New Delhi,  
11 India.

12 <sup>§</sup>Current Address – Biological Sciences and the Institute for Life Sciences, University of Southampton,  
13 Southampton, SO17 1BJ, United Kingdom.

14 <sup>||</sup>Current Address – Department of Biochemistry, Government College for Women, Cluster  
15 University, Srinagar, Srinagar, India.

16 \*Correspondence – Kalpana Luthra ([kalpanaluthra@gmail.com](mailto:kalpanaluthra@gmail.com))

17 **Abstract**

18 Due to the extensive antigenic diversity of human immunodeficiency virus-1 (HIV-1), broadly  
19 neutralizing antibodies (bnAbs) develop in a subset of infected individuals over 2-3 years of  
20 infection. Interestingly, infected infants have been shown to develop plasma bnAbs frequently and  
21 as early as one-year post-infection, with features atypical than adult bnAbs, suggesting that the  
22 factors governing bnAb induction in infants are distinct from that in adults. Understanding the viral  
23 characteristics in infected infants with early bnAb responses will provide key information on the  
24 antigenic triggers driving B cell maturation pathways towards the induction of bnAbs. Herein, we  
25 evaluated the presence of plasma bnAbs in a cohort of 51 HIV-1 clade C perinatally infected infants  
26 of Indian origin and identified viral factors associated with early bnAb responses. Plasma bnAbs  
27 targeting V2-apex on the env were predominant in infant elite and broad neutralizers. Circulating  
28 viral variants in infant elite neutralizers were susceptible to known bnAbs against V2-apex while  
29 varied resistance profile to other bnAb classes was observed. In infant elite neutralizers, multivariant  
30 infection was associated with plasma bnAbs targeting diverse autologous viruses. Our data provides  
31 information supportive of polyvalent vaccination approaches capable of inducing V2-apex bnAbs  
32 against HIV-1.

33 **Introduction**

34 An effective human immunodeficiency virus – 1 (HIV-1) vaccine that can curtail the AIDS pandemic is  
35 the need of the hour. The HIV-1 envelope glycoprotein (env), is a trimer of non-covalently linked

36 heterodimers (gp120/gp41)<sub>3</sub>, and is the primary target of broadly neutralizing antibodies (bnAbs).  
37 The bnAbs are capable of neutralizing diverse circulating variants of HIV-1 and are generated in rare  
38 subsets of infected individuals. Passive administration of such bnAbs in animal models and in  
39 recently conducted human clinical trials with bnAbs alone, or in combination with antiretroviral  
40 therapy, have shown protection from HIV-1 infection<sup>1,2</sup>. HIV-1 bnAbs are categorized based on their  
41 recognition of five distinct and largely conserved epitopes on the envelope spike that are promising  
42 vaccine targets: the N160 glycan located within the V2 loop at the trimer apex (V2-apex), high  
43 mannose patch centered around N332 in the V3 region, the CD4 binding site (CD4bs), the membrane  
44 proximal external region (MPER), and the N-glycans located at the gp120–gp41 interface<sup>1,2</sup>. A  
45 prolonged exposure to the viral env during natural infection has been implicated as a prerequisite  
46 for the development of broadly neutralizing antibodies (bnAbs) capable of neutralizing diverse viral  
47 strains, as is observed in select HIV-1-infected adults, who develop such bnAbs after a minimum of  
48 two to three years of infection<sup>3–6</sup>.

49 In HIV-1 infected children, plasma bnAbs arise earlier in infection, and show higher potency and  
50 breadth compared to adults<sup>7–11</sup>. We observed the presence of cross-neutralizing antibodies in HIV-1  
51 clade C chronically infected children<sup>11</sup> and recently generated a bnAb AIIMS-P01 from an elite  
52 pediatric neutralizer AIIMS\_330<sup>12</sup>. Further in this cohort of chronically infected children, AIIMS\_329  
53 and AIIMS\_330, a pair of identical twins, showed elite plasma neutralizing activity<sup>13</sup>. A longitudinal  
54 analysis of the plasma antibody response and circulating viral strains showed the presence of diverse  
55 circulating in both twins, with varied susceptibility to neutralization by plasma antibodies and bnAbs,  
56 irrespective of their similar genetic makeup and source of infection. Studies undertaken in infants  
57 have, however, documented that HIV-1 infected infants develop potent plasma bnAbs as early as  
58 one-year post-infection<sup>9,10</sup> suggesting that an effective vaccine in infants may perhaps be able to  
59 trigger the immune system and elicit an early bnAb response thus providing an impetus to evaluate  
60 the antibody response in a cohort of perinatally infected infants. Moreover, the bnAbs isolated from  
61 infected children show features atypical of adult bnAbs suggesting that the factors governing bnAb  
62 induction in infants are distinct from those in adults<sup>12,14</sup>.

63 Infants infected via mother-to-child transmission (MTCT), with the well-defined genetic bottleneck  
64 leading to infection with a minor variant<sup>15</sup>, provide a unique setting to understand the viral factors  
65 associated with induction of bnAbs. Herein, we evaluated the characteristic features of circulating  
66 viral strains in infants that show an early bnAb response to understand the antigenic triggers that  
67 drive B cell maturation pathways towards induction of bnAbs.

## 68 **Results**

## 69 Identification of HIV-1 infected infants with elite plasma neutralization activity

70 In order to identify infants with potent plasma nAbs in our cohort of 51 infants, HIV-1 specific plasma  
71 bnAb breadth was assessed. We first evaluated nonspecific inhibitory effect by assessing the  
72 inhibition of MuLV infection in a TZM-bl based pseudovirus neutralization assay. Of the 51 plasma  
73 samples, 4 showed nonspecific inhibitory effect and were excluded from further analysis. To identify  
74 infants with early bnAb responses, we next performed plasma neutralization activity of the  
75 remaining 47 infants against a panel of 12 genetically divergent pseudoviruses<sup>16,17</sup>, representing  
76 global viral diversity, in order to capture plasma bnAbs targeting diversity encountered in the  
77 context of global HIV-1 pandemic. Cross-clade neutralization activity (CrNA), the ability to neutralize  
78 non-clade C pseudoviruses (different clade than the infecting clade) at ID<sub>50</sub> titers >50, was observed  
79 in 19 of the 47 infants at a median time of 12-months post-infection (p.i.) (range = 6 – 24 months)  
80 (**Fig. 1A**). Further, plasma neutralization activity against an 8-virus panel of Indian origin was  
81 assessed<sup>13,17</sup>. While the geometric mean titres were comparable for infants with both the global  
82 panel and Indian clade C panel, infants had higher breadth against Indian clade C panel (**Fig. S1A –**  
83 **C**).

84 Though the plasma neutralization activity against the 12-virus global panel in infants was relatively  
85 broad with 21% (10/47) of infants neutralizing ≥50% of the pseudoviruses, their potency in  
86 comparison to plasma neutralization activity from previously characterized cohorts of chronically  
87 infected children and adults from our lab showed relatively lower magnitude (**Fig. 1B and C**), which  
88 prompted us to define pediatric elite neutralizers and broad neutralizers in the context of a modified  
89 breadth-potency matrix. For infant plasma samples, percent neutralization for each plasma-virus  
90 combination was recorded as a breadth-potency matrix at a fixed dilution of 1/50: >80%  
91 neutralization received a score of 3, >50% a score of 2, >20% a score of 1, and <20 received a score  
92 of 0. Maximum cumulative score for a given plasma was 36, and neutralization score was given as  
93 the ratio of cumulative score for respective plasma to the maximum cumulative score, providing  
94 neutralization score on a continuous matrix of 0 to 1, with values closer to 1 implying strong plasma  
95 neutralization activity. The normalized neutralization scores, predictive of geometric mean titres and  
96 cross-clade neutralization, were calculated (**Fig. 1D**). A cut-off of 0.7 defined the 90th-percentile  
97 boundary and was used to define elite neutralizers (neutralizing ≥90% pseudoviruses), whereas a  
98 cut-off of 0.3 (75th-percentile) was used to define broad neutralizers (neutralizing ≥50%  
99 pseudoviruses) (**Fig. S2A – B**). The neutralization scores for known elite and broad neutralizers from  
100 previously reported pediatric<sup>11</sup> and adult<sup>18</sup> cohorts were also calculated based on the same  
101 modified breadth-potency matrix, and the normalized neutralization score defined herein could  
102 categorize pediatric and adult elite and broad neutralizers (**Fig. S2B**). Based on this scoring system,

103 four infants were classified as elite neutralizers (AIIIMS704, AIIIMS706, AIIIMS709, and AIIIMS743) and  
104 six infants as broad neutralizers (AIIIMS731, AIIIMS719, AIIIMS736, AIIIMS744, AIIIMS732 and  
105 AIIIMS738) (**Table S1**).

### 106 **V2-apex targeting bnAbs predominated in infants with elite and broad plasma neutralization** 107 **activity**

108 Next, to delineate the epitope specificities of the plasma bnAbs from these infant elite and broad  
109 neutralizers, we used the HIV-25710\_2\_43 mutant pseudoviruses containing key mutations within  
110 the epitope for V2-apex, V3-glycan, CD4bs, gp120-gp41 interface and MPER. The plasma bnAbs of  
111 majority of the infants (8/10) were directed against the V2-glycan, with two elite neutralizers  
112 (AIIIMS704 and AIIIMS706) showing multi-epitope dependency, a feature reported to be typically  
113 associated with chronic antigenic exposure<sup>8,13</sup> (**Fig. 2A**). For AIIIMS709 and AIIIMS736, no  
114 dependence on any of the five epitopes was observed. To further validate that the high frequency of  
115 V2-apex targeting plasma nAbs were not specific to HIV-25710\_2\_43 pseudoviruses, infant plasmas  
116 that showed V2-apex dependence were further mapped with 16055, CAP45 and BG505 N160A  
117 mutant pseudoviruses (**Fig. 2B**). For AIIIMS706, additionally, N332A mutants of BG505, CAP256 and  
118 ConC were used as the plasma also had nAbs targeting V3-glycan (**Fig. 2C**). Though the extent of  
119 dependence varied from one pseudovirus to another, the expanded mapping showed similar trend  
120 as initial mapping done with HIV-25710\_2\_42, confirming high frequency of V2-apex plasma bnAbs  
121 in this cohort of infants. Interestingly, in AIIIMS704, in addition to V2-apex targeting plasma nAbs,  
122 MPER dependence was also observed. MPER-directed bnAbs are rare in individuals with acute  
123 infection, highlighting the uniqueness of our observation of MPER plasma bnAbs in a 12-month old  
124 infant. To address whether the pan-neutralization of the global panel by AIIIMS704 plasma nAbs  
125 were MPER mediated or an additive effect of having two distinct plasma nAb specificity, we depleted  
126 the MPER antibodies from AIIIMS704, and checked the neutralization of global panel with MPER-  
127 depleted AIIIMS704 plasma. Depletion of MPER antibodies from plasma was confirmed by binding  
128 ELISA against MPER-C peptide (**Fig. S3A – B**). MPER-depleted AIIIMS704 plasma antibodies  
129 neutralized 50% of the global panel (6/12), and showed a 2.14-fold reduction in GMT titres. All  
130 circulating recombinant viruses from the global panel (246F3, BJOX2000, CH119, CNE8 and CNE55)  
131 became resistant after depletion of MPER-specific plasma nAbs (**Fig. 2D, Fig. S3C**).

### 132 **Infants with elite neutralizing plasma bnAbs had multivariant HIV-1 infection**

133 We next focused our analysis on three parameters (viral load, CD4 count and duration of infection)  
134 to identify factors driving bnAb induction. No significant association was observed between CD4  
135 counts or duration of infection with neutralization breadth (**Fig. S4A – B**), suggesting that these

136 parameters did not influence bnAb induction in this cohort of infants. High viral load showed  
137 negative correlation with neutralization breadth ( $r = -0.497$ ,  $p = 0.002$ ) (**Fig. S4C**). Another factor  
138 influencing bnAb induction is the diversity in the viral envelope glycoprotein (env). Diversity in the  
139 viral env generated as a result of immune selection pressure (neutralization escape) or  
140 superinfection can independently drive bnAb induction<sup>5,6,13</sup>. To define viral diversity in the context  
141 of bnAb induction, we performed SGA analysis of env sequences<sup>19</sup> (V2C5 region of HIV-1 gp120,  
142 HXB2 position 6690 – 7757) from circulating viral variants in elite and broad neutralizers to assess  
143 the impact of viral diversity on bnAb induction. From elite and broad neutralizers, a total of 377 env  
144 gene sequences were obtained with more than 35 env sequences from each infant, giving a 90%  
145 confidence interval of sequencing circulating variants present at 5% population frequency (**Table 1**  
146 **and Table S2**). Sequences containing large deletions or G-to-A hypermutations were excluded. All  
147 sequences were predicted to be clade C throughout the env gene reading frame, and had the  
148 highest phylogenetic relatedness to the reference sequence C.IN.95IN21068.AF067155 (GenBank  
149 accession number AF067155) compiled in HIV database. Co-receptor usage was inferred based on V3  
150 loop sequences, and all 377 sequences were predicted to use CCR5.

151 Sequences were aligned, visually inspected using the highlighter tool and maximum likelihood  
152 phylogeny tree were generated to identify the pattern of viral transmission. Pairwise raw distance  
153 distribution (nucleotide substitution per site) and env gene diversity (mean genetic distance) were  
154 assessed to calculate the intra-host diversity. All four elite neutralizers (AIIIMS704, AIIIMS706,  
155 AIIIMS709 and AIIIMS743) showed evidence of multivariant HIV-1 infection (distinct clusters on  
156 highlighter plots and distinct branches on phylogeny tree with high degree of bootstrap support<sup>20–</sup>  
157 <sup>25</sup>), with one infant, AIIIMS709, showing two highly divergent variants, plausibly due to  
158 superinfection, that needs to be further explored (**Fig. 3A – B**, **Fig. 4A – D**). SGA env sequences from  
159 broad neutralizers (AIIIMS731, AIIIMS719, AIIIMS736, AIIIMS744, AIIIMS732 and AIIIMS738) were  
160 monophyletic (**Fig. 3A**). Within-patient diversity in elite neutralizers ranged from 0.6 to 15.1 (**Table**  
161 **1**). Such extent of within-patient diversity are typical of multivariant infections<sup>19,21,22,24</sup>. AIIIMS709  
162 had the maximum within-patient diversity, further confirming infection with highly divergent viruses.  
163 For broad neutralizers, within-patient diversity ranged from 0.3 to 0.7, a feature typical of infection  
164 with a single virus or multiple closely related viruses (**Table 1**). Significantly higher evolutionary  
165 divergence (nucleotide substitutions per site) was observed in elite neutralizers compared to broad  
166 neutralizers ( $p = 0.0095$ ) (**Fig. S5A – B**). Moreover, the multivariant infection in this infant cohort was  
167 significantly associated (odds ratio >35,  $p = 0.043$ ) with development of plasma breadth, though a  
168 small sample size might have skewed the association.

169 **Contemporaneous plasma bnAbs are effective against autologous circulating viruses in infant elite**  
170 **neutralizers**

171 To gain insight and evaluate the impact of multivariant infection and decipher viral characteristics  
172 associated with the development of plasma nAbs in infant elite neutralizers, we next generated  
173 functional pseudoviruses from all four infant elite neutralizers. The generated pseudoviruses were  
174 tested for neutralization by autologous nAbs. Distinct viral populations in each of the infected infant  
175 showed varied susceptibility to autologous plasma nAbs, with several variants sensitive and others  
176 moderately sensitive to autologous plasma bnAbs (**Fig. 5A**), an observation we previously reported  
177 to be a plausible driver of elite plasma neutralization activity<sup>13</sup>. Moreover, none of the circulating  
178 viral strains in four infants were resistant to autologous plasma nAbs. In addition, susceptibility of  
179 the pseudoviruses from these infant elite neutralizers to known bnAbs and non-nAbs was also  
180 assessed. Majority of the pseudoviruses showed similar neutralization susceptibility profile to V2-  
181 apex targeting bnAbs while the susceptibility to other bnAb classes varied between pseudoviruses.  
182 Notable sequence similarity was observed in the strand B and C of the V2-loop of the pseudoviruses  
183 (**Fig. S6**). No reactivity was observed with non-nAbs for majority of the pseudoviruses, suggesting a  
184 well-ordered trimeric configuration (**Fig. 5A**). To study the antigenic and conformational  
185 characteristics of intact, native env trimers, we transiently transfected HEK293T cells with respective  
186 env clones from each infant elite neutralizer that showed maximum susceptibility to autologous  
187 plasma nAbs and the panel of known bnAbs. No effect of sCD4 on the binding of 2G12, which binds  
188 an exposed glycan epitope on gp120, was observed suggesting CD4 binding did not induce gp120  
189 dissociation (**Fig. 5B-E**). CD4-induced non-neutralizing antibodies, 17b and A32, that bind the open  
190 trimer showed no binding and in presence of sCD4, only weak binding could be observed.  
191 Predominant binding of trimer-specific bnAbs PGDM1400, and CAP256.25 was observed, though  
192 binding of 10-1074 and PGT151 did vary between envs. The viral variants from these infant elite  
193 neutralizers were susceptible to bnAbs, showed diverse susceptibility profile to autologous plasma  
194 nAbs, and plausibly adopted closed trimeric conformations.

195 **Discussion**

196 Broadly neutralizing antibody (bnAbs) responses in HIV-1 infected adults have been well established,  
197 whereas limited number of studies exist assessing these responses in HIV-1 infected children. Apart  
198 from select studies, information on the neutralization activity of plasma antibodies in infants is  
199 lacking. Herein, we observed cross-clade neutralizing activity in 42% of the infected infants, and even  
200 though we used a less stringent cut-off of 1/50, the virus panel utilized in this study had a relatively  
201 higher percentage of difficult to neutralize pseudoviruses (normalized tier scores of 2.5 to 3)<sup>16,26</sup>. In

202 the study conducted by Goo et. al.<sup>9</sup>, 71% of the infected infants showed cross-clade neutralization.  
203 Prevalence of crNA in HIV-1 infected individuals from different cohorts has been shown to be 10 to  
204 30%. The GMT values observed in this study were on the lower side, plausibly due to limited  
205 exposure to the antigen with a median infection duration of 12-months. Development of potent  
206 plasma antibodies usually requires two to four years post-seroconversion, and is aided by chronic  
207 antigen exposure<sup>3,4,11,18,27</sup>.

208 Currently reported bnAbs primarily target five epitopes on env: glycan dependent sites within the V2  
209 and V3 (V2-apex and V3-glycan) regions, CD4 binding site (CD4bs), gp120/gp41 interface, and  
210 membrane proximal external region (MPER)<sup>1,2</sup>. The plasma antibodies of majority of the infants in  
211 this study were found to be directed against the V2-apex. Despite the high variability in terms of the  
212 sequence, glycosylation and length of the V2-apex of HIV-1 envelope, bnAbs directed against V2-  
213 apex are elicited relatively early and are one of the most potent classes of bnAbs<sup>1-4</sup>. The findings  
214 herein of a high frequency of V2-apex bnAbs in infants with cross-clade neutralization activity is in  
215 consensus with previous observations in infected children<sup>8</sup>. Given the relatively higher frequency,  
216 earlier induction, moderate level of somatic hypermutation, and consistent cross-clade neutralizing  
217 activity of V2-apex bnAbs in conjunction with cross-species conservation of the epitope given its  
218 critical function for trimer disassembly during viral entry<sup>3,4,27-30</sup>, this bnAb epitope has been focus of  
219 recent immunogen design approaches. Our results further support the notion for exploring V2-apex  
220 targeting bnAbs, either as prophylactics or immunogen targeted induction, in the field of HIV-1  
221 vaccinology. In two infant elite neutralizers, multi-epitope dependency was observed. Antibodies  
222 targeting multiple epitopes in children have been reported, though chronic exposure has been  
223 suggested as one of the mechanisms for the development of multiple antibody lineage.  
224 Nevertheless, the exact factors that predispose children for the development of multiple bnAb  
225 lineages are unknown and need to be addressed. Antibodies against MPER are rarely elicited in  
226 children, plausibly due to the structural constraints in accessing the MPER as well as autoreactivity of  
227 MPER bnAbs. Our findings of MPER nAbs in a 12-month old infant (AIIMS704) suggests similar bnAbs  
228 can be induced early with targeted vaccination strategies that can plausibly overcome the linked  
229 immune tolerance mechanisms blocking such nAbs.

230 Diversity in the viral env, either generated by immune selection pressure (neutralization escape) or  
231 superinfection, has been shown to be an independent driver of bnAb induction<sup>5,6,13</sup>. In our cohort, a  
232 significant association between multivariant infection and elite plasma neutralization activity was  
233 seen, and though at the time of recruitment, all infants were in Fiebig stage VI, the extent of  
234 diversity observed could not be explained with established models of mutations gained due to  
235 escape mutations as a result of selection due to plasma nAbs<sup>19,21,25</sup>. Multivariant HIV-1 infection is

236 more commonly seen in adults than in children who have acquired the infection by vertical  
237 transmission<sup>19–21,31</sup>. In both children and adults, the stringent genetic bottleneck for transmission  
238 often leads to infection by a single viral variant<sup>32–34</sup>. HIV-1 multivariant infection is defined as one  
239 person infected with two or more different HIV-1 strains. According to the timing of infection with  
240 the second strain, multivariant infections can be divided into co-infection<sup>33</sup> (acquisition of a second  
241 strain either simultaneously or before seroconversion) and superinfection<sup>34,35</sup> (acquisition of a  
242 second strain after seroconversion), but given the cross-sectional nature of this study, we could only  
243 categorically decipher the timeline of the multivariant infections, and hence used the broad term of  
244 multivariant infection.

245 A better understanding of the mechanisms that determine the wide range of neutralization  
246 sensitivity and antigenic landscape of circulating primary HIV-1 isolates would provide important  
247 information about the natural structural and conformational diversity of HIV-1 env and how this  
248 affects the neutralization phenotype. Circulating viruses in infected individuals who develop potent  
249 plasma bnAbs characteristically develop resistance to autologous plasma nAbs as a result of the  
250 mutations acquired due to immune selection pressure. Herein, the circulating viruses sensitive to  
251 autologous plasma nAbs in all four elite neutralizers were observed. Interestingly, despite the  
252 presence of V2-apex targeting plasma nAbs, circulating viral variants of AIIIMS704, AIIIMS706 and  
253 AIIIMS743 retained epitope-defining sequences and N-glycosylation sites at V2-apex. In addition,  
254 epitope defining key residues for all bnAb classes (V2-apex, V3-glycan, CD4bs, gp120-gp41 interface  
255 and MPER) were retained on circulating viruses from AIIIMS704 and AIIIMS706. A fundamental  
256 challenge in HIV-1 vaccine strategy has been the development of native-like trimers capable of  
257 expressing bnAb epitopes while occluding immune-dominant non-neutralizing antibody epitopes.  
258 Preferential binding of bnAbs and not nnAbs has been correlated with efficient cleavage of env  
259 gp160 polypeptide into its constituent subunits (gp120 and gp41). For immunogen design, efficient  
260 cleavage of candidate envs is a desirable property. For majority of the envs from elite neutralizers,  
261 CD4i targeting antibodies (17b, 48d and A32) showed negligible binding following sCD4 triggering  
262 while trimer-specific bnAbs showed prominent binding, suggesting a stable and homogenous  
263 conformational and antigenic state. In addition, recent line of evidence suggest that select HIV-1  
264 viral variant have the capability to initiate bnAb responses<sup>36</sup>. Given that these infants generated  
265 remarkable antibody response within a year of infection, envs from these infants can be explored as  
266 potential immunogen candidates.

267 In this cross-sectional study on a small cohort of HIV-1 clade C infected infants, we have  
268 demonstrated an association of multivariant infection with the development of plasma bnAb  
269 response. Though exposure to two distinct viral variants in adults has been shown to be not



270 sufficient to broaden neutralizing antibody responses<sup>37,38</sup>, our findings of an early bnAb response in  
271 context of multivariant infection can be a distinct feature of infant immune response to HIV-1  
272 infection. This needs to be validated in established cohorts of HIV-1 infected infants. Our data  
273 provides key evidence for exploring polyvalent vaccination approaches for pediatric HIV-1 infection.  
274 Polyvalent vaccines have been less explored due to immunodominance of HIV-1 which in turn can  
275 diminish the efficacy of vaccines<sup>39,40</sup>. We observed the plasma nAbs in infants with multivariant  
276 infection to target both variants, suggesting env specific antibodies generated in context of two  
277 distinct viral variants can target epitopes on both envelopes. In addition, viral variants from these  
278 infants can be explored as candidate priming immunogens to elicit V2-apex targeting bnAbs.  
279 Furthermore, longitudinal analysis in established infant cohorts should be undertaken to understand  
280 how the immune system in infants responds to multiple HIV-1 strains which will provide key insights  
281 for guiding the early development of such bnAbs. To conclude, our results further add to a growing  
282 body of literature suggesting infants may have different immunological tolerance mechanisms and  
283 may be permissive for the development of bnAbs.

## 284 **Materials and Methods**

### 285 **Study design and participants**

286 The current study was designed to decipher the viral characteristics that influence the early  
287 induction of plasma bnAbs in HIV-1 infected infants. Antiretroviral naïve and asymptomatic HIV-1  
288 infected infants below the age of 2-years visiting the Pediatric Chest Clinic, Department of Pediatrics,  
289 AIIMS during the duration of this study were recruited randomly. A total of 51 antiretroviral naïve  
290 and asymptomatic HIV-1 infected infants were recruited for this study. After written informed  
291 consent from guardians, blood was drawn in 3-ml EDTA vials, plasma was aliquoted for plasma  
292 neutralization assays, viral RNA isolation, and viral loads. The study was approved by institute ethics  
293 committee of All India Institute of Medical Sciences. The median age for infected infants was 12-  
294 months (IQR, 8 – 19), the median CD4 count was 1731 cells/mm<sup>3</sup> (IQR, 1498 – 2562) and the median  
295 viral load on log scale was 5.804 RNA copies/ml (IQR, 5.331 – 6.301).

### 296 **Plasmids, viruses, monoclonal antibodies, and cells**

297 Plasmids encoding HIV-1 env genes representing different clades, monoclonal antibodies and TZM-bl  
298 cells were procured from NIH AIDS Reagent Program. 10-1074 and BG18 expression plasmids were  
299 kindly provided by Dr. Michel Nussenzweig, Rockefeller University, USA. CAP256.09, CAP256.25 and  
300 b6 were procured from IAVI Neutralizing Antibody Centre, USA. HEK293T cells were purchased from  
301 the American Type Culture Collection (ATCC).

## 302 **Neutralization assay**

303 Neutralization assays were carried out using TZM-bl cells, a genetically engineered HeLa cell line that  
304 constitutively expresses CD4, CCR5 and CXCR4, and contains luciferase and  $\beta$ -galactosidase gene  
305 under HIV-1 tat promoter, as described before<sup>13</sup>. Neutralization studies included 47 heat-inactivated  
306 plasmas from infants, 19 bnAbs (PG9, PG16, PGT145, PGDM1400, CAP256.09, CAP256.25, 10-1074,  
307 BG18, AIIIMS-P01, PGT121, PGT128, PGT135, VRC01, N6, 3BNC117, PGT151, 35O22, 10E8 and 4E10)  
308 and 6 non-nAbs (b6, F105, 17b, 48d, A32, 447-52D). Briefly, envelope pseudoviruses were incubated  
309 in presence of serially diluted heat inactivated plasmas, bnAbs or non-nAbs for one hour. After  
310 incubation, freshly Trypsinized TZM-bl cells were added, with 25  $\mu$ g/ml DEAE-Dextran. The plates  
311 were incubated for 48h at 37°C, cells were lysed in presence of Bright Glow reagent, and  
312 luminescence was measured. Using the luminescence of serially diluted bnAbs or plasma, a non-  
313 linear regression curve was generated and titres were calculated as the bnAb concentration, or  
314 reciprocal dilution of serum that showed 50% reduction in luminescence compared to untreated  
315 virus control. For plasma samples, percent neutralization for each plasma-virus combination was  
316 recorded as a breadth-potency matrix at a fixed dilution of 1/50: >80% neutralization received a  
317 score of 3, >50% a score of 2, >20% a score of 1, and <20 received a score of 0. Maximum cumulative  
318 score for a given plasma was 36, and neutralization score was given as the ratio of cumulative score  
319 for respective plasma to the maximum cumulative score, providing neutralization score on a  
320 continuous matrix of 0 to1, with values closer to 1 implying strong plasma neutralization activity. For  
321 epitope mapping, HIV-25710-2.43 pseudoviruses with key mutations within major bnAb epitopes  
322 were used<sup>13</sup>, and greater than 3-fold reduction in ID50 titres were classified as dependence. HIV-  
323 25710-2.43 mutants included N160K (V2-apex), N332K (V3-glycan), R456W (CD4 binding site),  
324 A512W-G514W (Interface) and W672L-F673L (MPER). Extended mapping with N160K mutants of  
325 16055\_2\_3, CAP45\_G3 and BG505\_W6M\_C2, and N332K mutants of CAP256\_SU, BG505\_W6M\_C2,  
326 and ConC was performed for samples that showed V2-apex and V3-glycan dependence respectively.

## 327 **Depletion of MPER plasma antibodies and binding ELISAs**

328 4 wells in 96-well ELISA plates were coated with MPER-C peptide overnight at 4°C. 100  $\mu$ l of plasma  
329 was added and following a 45-minute incubation, plasma was iteratively adsorbed in the remaining  
330 three wells. MPER binding ELISA was performed as described previously<sup>13</sup>. Briefly, 96 well ELISA  
331 plates (Corning, USA) was coated with 2  $\mu$ g/ml of MPER-C peptides overnight at 4°C. Coated plates  
332 were washed with PBS containing 0.05% Tween 20. Plates were blocked with 5% skimmed milk in  
333 blocking buffer. A 50-fold dilution of plasmas, was added, titrated in 2-fold dilution series, and  
334 incubated at 37°C for 1 hour. Unbound plasma antibodies were washed with wash buffer and plates

335 were incubated with peroxidase conjugated goat anti-human IgG at a dilution of 1:1000. Following  
336 secondary antibody incubation, the wells were washed, and TMB substrate was added. After color  
337 development, reaction was stopped with 0.2 M H<sub>2</sub>SO<sub>4</sub> and absorbance was measured at 405 nm.

### 338 **HIV-1 envelope sequences and phylogenetic analysis**

339 HIV-1 envelope genes were PCR amplified from plasma viral RNA by single genome amplification and  
340 directly sequenced commercially. Individual sequence fragments of SGA amplified amplicons were  
341 assembled using Sequencher 5.4 (Gene Code Corporation). Subtyping for SGA sequences was  
342 performed with REGA HIV subtyping tool (400bp sliding window with 200bp steps size). Inter-clade  
343 recombination was examined with RIP 3.0 (Recombinant Identification Program) and with jpHMM.  
344 Nucleotide sequences were aligned with MUSCLE in MEGA X. Maximum-likelihood trees were  
345 computed with MEGA X using a general-time reversal substitution model incorporating a discrete  
346 gamma distribution with 5 invariant sites. Evolutionary divergence within each infant's SGA  
347 sequence was conducted in MEGA X and was calculated as number of base substitutions per site  
348 from averaging over all sequence pairs. Analyses were conducted using the Maximum Composite  
349 Likelihood model. The rate variation among sites was modelled with a gamma distribution (shape  
350 parameter = 5). This analysis involved 18 nucleotide sequences. Codon positions included were  
351 1st+2nd+3rd+Noncoding. All ambiguous positions were removed for each sequence pair (pairwise  
352 deletion option). There were a total of 2622 positions in the final dataset.

### 353 **Nucleotide sequence accession numbers**

354 The SGA amplified HIV-1 envelope sequences used for inference of phylogeny and highlighter plots  
355 are available at GenBank with accession numbers MN703343 – MN703404.

### 356 **Cloning of autologous HIV-1 envelope genes and production of replication incompetent 357 pseudoviruses**

358 Autologous replication incompetent envelope pseudoviruses were generated from AIIIMS704,  
359 AIIIMS706, AIIIMS709 and AIIIMS743 (elite neutralizers) as described previously<sup>13</sup>. Briefly, viral RNA  
360 was isolated from 140 µl of plasma using QIAamp Viral RNA Mini Kit, reverse transcribed, using gene  
361 specific primer OFM19 (5' - GCACTCAAGGCAAGCTTTATTGAGGCTTA – 3') and Superscript III reverse  
362 transcriptase, into cDNA which was used in two-round nested PCR for amplification of envelope  
363 gene using High Fidelity Phusion DNA Polymerase (New England Biolabs). The envelope amplicons  
364 were purified, and ligated into pcDNA3.1D/V5-His-TOPO vector (Invitrogen). Pseudoviruses were  
365 prepared by co-transfecting 1.25 µg of HIV-1 envelope containing plasmid with 2.5 µg of an envelope  
366 deficient HIV-1 backbone (PSG3Δenv) vector at a molar ratio of 1:2 using PEI-MAX as transfection

367 reagent in HEK293T cells seeded in a 6-well culture plates. Culture supernatants containing  
368 pseudoviruses were harvested 48 hours post-transfection, filtered through 0.4 $\mu$  filter, aliquoted and  
369 stored at -80°C until further use. TCID<sub>50</sub> was determined by infecting TZM-bl cells with serially diluted  
370 pseudoviruses in presence of DEAE-Dextran, and lysing the cells 48 hours post-infection. Infectivity  
371 titres were determined by measuring luminescence activity in presence of Bright Glow reagent  
372 (Promega).

### 373 **Flow cytometric analysis of antibody binding to cell surface expressed envs**

374 1.25 x 10<sup>5</sup> HEK293T cells seeded in a 12-well plate were transiently transfected with 1.25  $\mu$ g of env-  
375 coding plasmids (pcDNA3.1 with cloned env/rev cassettes) using PEI-MAX. 48 hours post-  
376 transfection, cells were harvested and per experimental requirement, distributed in 1.5 ml  
377 microcentrifuge tubes. For sCD4 triggering, 10  $\mu$ g/ml of 2-domain sCD4 was added and incubated for  
378 30 minutes at room temperature. For monoclonal antibody staining, 10  $\mu$ g/ml of antibody was used  
379 and titrated 2-fold in staining buffer. 100  $\mu$ l of primary antibody (HIV-1 specific monoclonals) were  
380 added to HEK293T cells expressing envs, and incubated for 30 minutes at room temperature. After  
381 washing, 100  $\mu$ l of 1:500 diluted PE conjugated goat anti-human Fc was added, and after 30-minute  
382 incubation, cells were acquired on BD LSRFortessa X20. Data was analyzed using FlowJo software  
383 (version v10.6.1).

### 384 **Statistical analysis**

385 Mann-Whitney U test and Kruskal-Wallis test were used for comparison of two and three  
386 parameters respectively. All statistical analyses were performed on GraphPad Prism 8. A p-value of  
387 <0.05 was considered significant.

### 388 **Acknowledgments**

389 We thank all the study subjects for participating in this study. We are thankful to NIH AIDS Reagent  
390 program for providing HIV-1 envelope pseudovirus plasmids, bnAbs, non-nAbs and their expression  
391 plasmids, and TZM-bl cells, and Neutralizing Antibody Consortium (NAC), IAVI, USA for providing  
392 bnAbs. We are thankful to Dr. Michel Nussenzweig for providing 10-1074 and BG18 bnAb expression  
393 plasmids. This work was funded by Department of Biotechnology, India. The Junior Research  
394 Fellowship (January 2016 – December 2018) and Senior Research Fellowship (January 2019 –  
395 October 2019) to N.M was supported by University Grants Commission (UGC), India.

396 **Author contributions:** N.M designed the study, performed SGA amplification, pseudovirus cloning,  
397 and neutralization assays, analyzed data, wrote the initial manuscript, revised and finalized the  
398 manuscript. S.S and A.D contributed to SGA amplification, pseudovirus cloning, and neutralization

399 assays. S.K and H.C expressed PGDM1400, CAP256.25, BG18, 10-1074 and AIIMS-P01 bnAb. R.S,  
400 B.K.D, R.L, and S.K.K, provided the samples from HIV-1 infected infants. R.L and S.K.K provided  
401 patient care and management. S.K, H.C, and M.A.M edited and revised the manuscript. K.L designed  
402 the study, edited, revised and finalized the manuscript.

403 **Competing interests:** The authors declare no competing financial interests.

404 **Data and materials availability:** The SGA amplified HIV-1 envelope sequences used for inference of  
405 phylogeny and highlighter plots are available at GenBank with accession numbers MN703343 –  
406 MN703404.

#### 407 **References**

- 408 1. Sok, D. & Burton, D. R. Recent progress in broadly neutralizing antibodies to HIV. *Nat. Immunol.*  
409 **19**, 1179–1188 (2018).
- 410 2. Kwong, P. D. & Mascola, J. R. HIV-1 Vaccines Based on Antibody Identification, B Cell Ontogeny,  
411 and Epitope Structure. *Immunity* **48**, 855–871 (2018).
- 412 3. Doria-Rose, N. A. *et al.* Developmental pathway for potent V1V2-directed HIV-neutralizing  
413 antibodies. *Nature* **509**, 55–62 (2014).
- 414 4. Bonsignori, M. *et al.* Analysis of a clonal lineage of HIV-1 envelope V2/V3 conformational  
415 epitope-specific broadly neutralizing antibodies and their inferred unmutated common  
416 ancestors. *J. Virol.* **85**, 9998–10009 (2011).
- 417 5. Anthony, C. *et al.* Cooperation between Strain-Specific and Broadly Neutralizing Responses  
418 Limited Viral Escape and Prolonged the Exposure of the Broadly Neutralizing Epitope. *J. Virol.* **91**,  
419 (2017).
- 420 6. Moore, P. L. *et al.* Evolution of an HIV glycan-dependent broadly neutralizing antibody epitope  
421 through immune escape. *Nat. Med.* **18**, 1688–1692 (2012).
- 422 7. Muenchhoff, M. *et al.* Nonprogressing HIV-infected children share fundamental immunological  
423 features of nonpathogenic SIV infection. *Sci Transl Med* **8**, 358ra125 (2016).
- 424 8. Ditse, Z. *et al.* HIV-1 Subtype C-Infected Children with Exceptional Neutralization Breadth Exhibit  
425 Polyclonal Responses Targeting Known Epitopes. *J. Virol.* **92**, (2018).
- 426 9. Goo, L., Chohan, V., Nduati, R. & Overbaugh, J. Early development of broadly neutralizing  
427 antibodies in HIV-1-infected infants. *Nat. Med.* **20**, 655–658 (2014).
- 428 10. Ghulam-Smith, M. *et al.* Maternal but Not Infant Anti-HIV-1 Neutralizing Antibody Response  
429 Associates with Enhanced Transmission and Infant Morbidity. *mBio* **8**, (2017).
- 430 11. Makhdoomi, M. A. *et al.* Evolution of cross-neutralizing antibodies and mapping epitope  
431 specificity in plasma of chronic HIV-1-infected antiretroviral therapy-naïve children from India. *J.*  
432 *Gen. Virol.* **98**, 1879–1891 (2017).
- 433 12. Kumar, S. *et al.* An HIV-1 broadly neutralizing antibody from a clade C infected pediatric elite  
434 neutralizer potently neutralizes the contemporaneous and autologous evolving viruses. *J. Virol.*  
435 (2018) doi:10.1128/JVI.01495-18.
- 436 13. Mishra, N. *et al.* Viral Characteristics Associated with Maintenance of Elite Neutralizing Activity  
437 in Chronically HIV-1 Clade C-Infected Monozygotic Pediatric Twins. *J. Virol.* **93**, (2019).
- 438 14. Simonich, C. A. *et al.* HIV-1 Neutralizing Antibodies with Limited Hypermutation from an Infant.  
439 *Cell* **166**, 77–87 (2016).
- 440 15. Overbaugh, J. Mother-infant HIV transmission: do maternal HIV-specific antibodies protect the  
441 infant? *PLoS Pathog.* **10**, e1004283 (2014).
- 442 16. deCamp, A. *et al.* Global panel of HIV-1 Env reference strains for standardized assessments of  
443 vaccine-elicited neutralizing antibodies. *J. Virol.* **88**, 2489–2507 (2014).

- 444 17. Kulkarni, S. S. *et al.* Highly complex neutralization determinants on a monophyletic lineage of  
445 newly transmitted subtype C HIV-1 Env clones from India. *Virology* **385**, 505–520 (2009).
- 446 18. Khan, L. *et al.* Identification of CD4-Binding Site Dependent Plasma Neutralizing Antibodies in an  
447 HIV-1 Infected Indian Individual. *PLoS ONE* **10**, e0125575 (2015).
- 448 19. Keele, B. F. *et al.* Identification and characterization of transmitted and early founder virus  
449 envelopes in primary HIV-1 infection. *Proc. Natl. Acad. Sci. U.S.A.* **105**, 7552–7557 (2008).
- 450 20. Novitsky, V., Moyo, S., Wang, R., Gaseitsiwe, S. & Essex, M. Deciphering Multiplicity of HIV-1C  
451 Infection: Transmission of Closely Related Multiple Viral Lineages. *PLoS ONE* **11**, e0166746  
452 (2016).
- 453 21. Bar, K. J. *et al.* Wide variation in the multiplicity of HIV-1 infection among injection drug users. *J.*  
454 *Viol.* **84**, 6241–6247 (2010).
- 455 22. Chaillon, A. *et al.* Characterizing the multiplicity of HIV founder variants during sexual  
456 transmission among MSM. *Virus Evol* **2**, vew012 (2016).
- 457 23. de Azevedo, S. S. D. *et al.* Highly divergent patterns of genetic diversity and evolution in proviral  
458 quasispecies from HIV controllers. *Retrovirology* **14**, 29 (2017).
- 459 24. Leitner, T. & Romero-Severson, E. Phylogenetic patterns recover known HIV epidemiological  
460 relationships and reveal common transmission of multiple variants. *Nat Microbiol* **3**, 983–988  
461 (2018).
- 462 25. Bons, E., Bertels, F. & Regoes, R. R. Estimating the mutational fitness effects distribution during  
463 early HIV infection. *Virus Evol* **4**, vey029 (2018).
- 464 26. Hraber, P., Korber, B., Wagh, K., Montefiori, D. & Roederer, M. A single, continuous metric to  
465 define tiered serum neutralization potency against HIV. *Elife* **7**, (2018).
- 466 27. Moore, P. L. *et al.* Potent and broad neutralization of HIV-1 subtype C by plasma antibodies  
467 targeting a quaternary epitope including residues in the V2 loop. *J. Virol.* **85**, 3128–3141 (2011).
- 468 28. Landais, E. *et al.* Broadly Neutralizing Antibody Responses in a Large Longitudinal Sub-Saharan  
469 HIV Primary Infection Cohort. *PLoS Pathog.* **12**, e1005369 (2016).
- 470 29. Wibmer, C. K. *et al.* Viral escape from HIV-1 neutralizing antibodies drives increased plasma  
471 neutralization breadth through sequential recognition of multiple epitopes and immunotypes.  
472 *PLoS Pathog.* **9**, e1003738 (2013).
- 473 30. Andrabi, R. *et al.* Identification of Common Features in Prototype Broadly Neutralizing  
474 Antibodies to HIV Envelope V2 Apex to Facilitate Vaccine Design. *Immunity* **43**, 959–973 (2015).
- 475 31. Kumar, A. *et al.* Infant transmitted/founder HIV-1 viruses from peripartum transmission are  
476 neutralization resistant to paired maternal plasma. *PLoS Pathog.* **14**, e1006944 (2018).
- 477 32. Kishko, M. *et al.* Genotypic and functional properties of early infant HIV-1 envelopes.  
478 *Retrovirology* **8**, 67 (2011).
- 479 33. Luan, H. *et al.* Dual Infection Contributes to Rapid Disease Progression in Men Who Have Sex  
480 With Men in China. *J. Acquir. Immune Defic. Syndr.* **75**, 480–487 (2017).
- 481 34. Bhiman, J. N. *et al.* Viral variants that initiate and drive maturation of V1V2-directed HIV-1  
482 broadly neutralizing antibodies. *Nat. Med.* **21**, 1332–1336 (2015).
- 483 35. Gao, Y., Tian, W., Han, X. & Gao, F. Immunological and virological characteristics of human  
484 immunodeficiency virus type 1 superinfection: implications in vaccine design. *Front Med* **11**,  
485 480–489 (2017).
- 486 36. Kouyos, R. D. *et al.* Tracing HIV-1 strains that imprint broadly neutralizing antibody responses.  
487 *Nature* **561**, 406–410 (2018).
- 488 37. Sheward, D. J. *et al.* HIV Superinfection Drives De Novo Antibody Responses and Not  
489 Neutralization Breadth. *Cell Host Microbe* **24**, 593-599.e3 (2018).
- 490 38. Wagner, G. A. *et al.* Intrasubtype B HIV-1 Superinfection Correlates with Delayed Neutralizing  
491 Antibody Response. *J. Virol.* **91**, (2017).
- 492 39. van Schooten, J. & van Gils, M. J. HIV-1 immunogens and strategies to drive antibody responses  
493 towards neutralization breadth. *Retrovirology* **15**, 74 (2018).

- 494 40. Havenar-Daughton, C., Lee, J. H. & Crotty, S. Tfh cells and HIV bnAbs, an immunodominance  
495 model of the HIV neutralizing antibody generation problem. *Immunol. Rev.* **275**, 49–61 (2017).  
496  
497

498 **Figures and Tables**

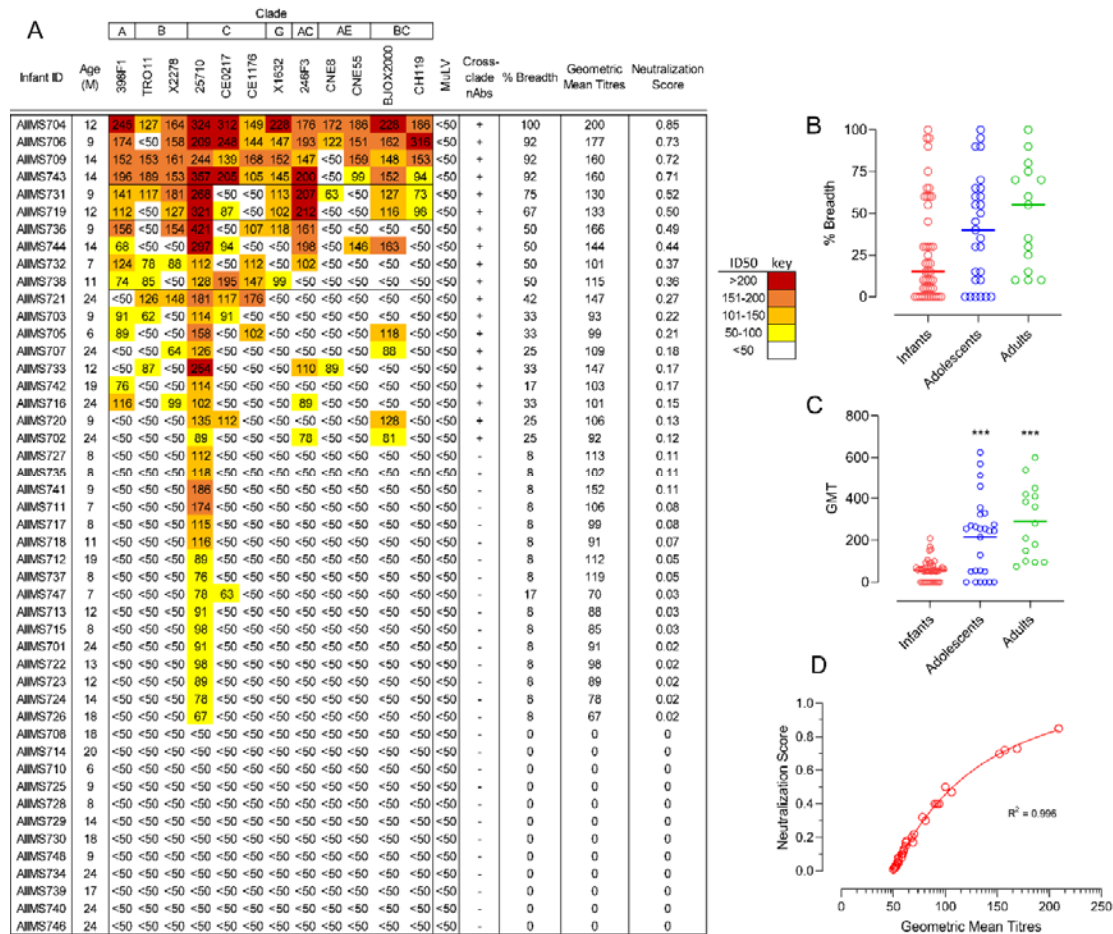

499

500 **Fig. 1 – Identification of plasma bnAb-inducing infants.** (A) Heatmap representing HIV-1 specific  
 501 neutralization titres (inverse plasma dilution) of plasma nAbs from 47 infant samples against the 12-  
 502 virus global panel. ID50 values are color-coded per the key given, with darker colors implying higher  
 503 ID50 titres. (B and C) Comparison of breadth (pseudoviruses showing >50% neutralization at 1/50  
 504 plasma dilution) and geometric mean titres of infants with previously established cohorts of  
 505 chronically infected children (labelled ‘adolescents’) and adults. (D) Modified neutralization scores  
 506 predict geometric mean titres.



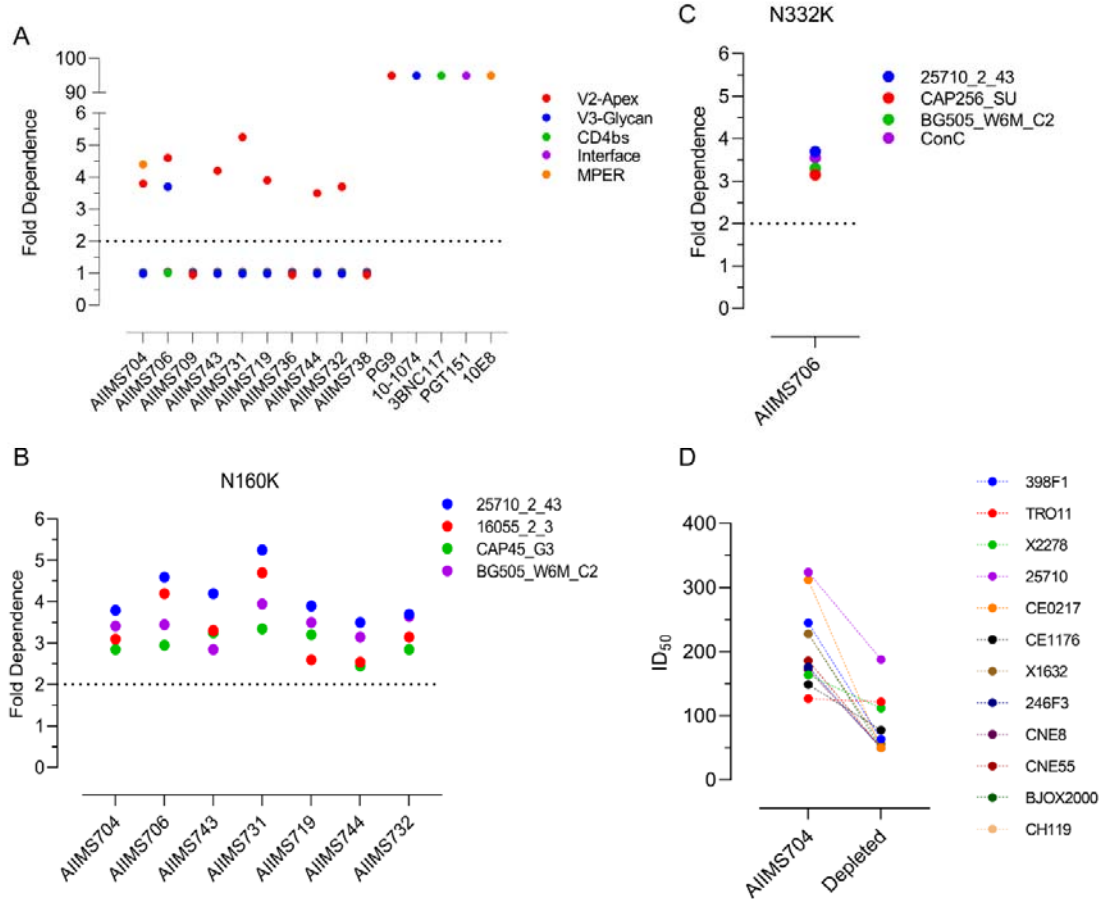

507

508 **Fig. 2 – V2-apex targeting plasma nAbs predominate in HIV-1 infected infants.** (A) Epitope mapping  
 509 done by mutant viruses in HIV-25710\_2\_43 backbone for V2-apex (N160K), V3-glycan (N332A),  
 510 CD4bs (R456W), Interface (A512W-G514W) and MPER (W672L-F673L). PG9 (V2-apex), 10-1074 (V3-  
 511 glycan), 3BNC117 (CD4bs), PGT151 (Interface) and 10E8 (MPER) bnAbs were used as positive  
 512 controls. (B) V2-apex (N160K) dependence of infants with diverse pseudoviral backbones. (C) V3-  
 513 glycan (N332K) dependence of AIIIMS706 plasma nAbs against diverse pseudoviral backbone. (D)  
 514 Comparison of ID<sub>50</sub> titres of AIIIMS704 plasma (undepleted) and MPER-peptide depleted plasma  
 515 against the 12-virus global panel.

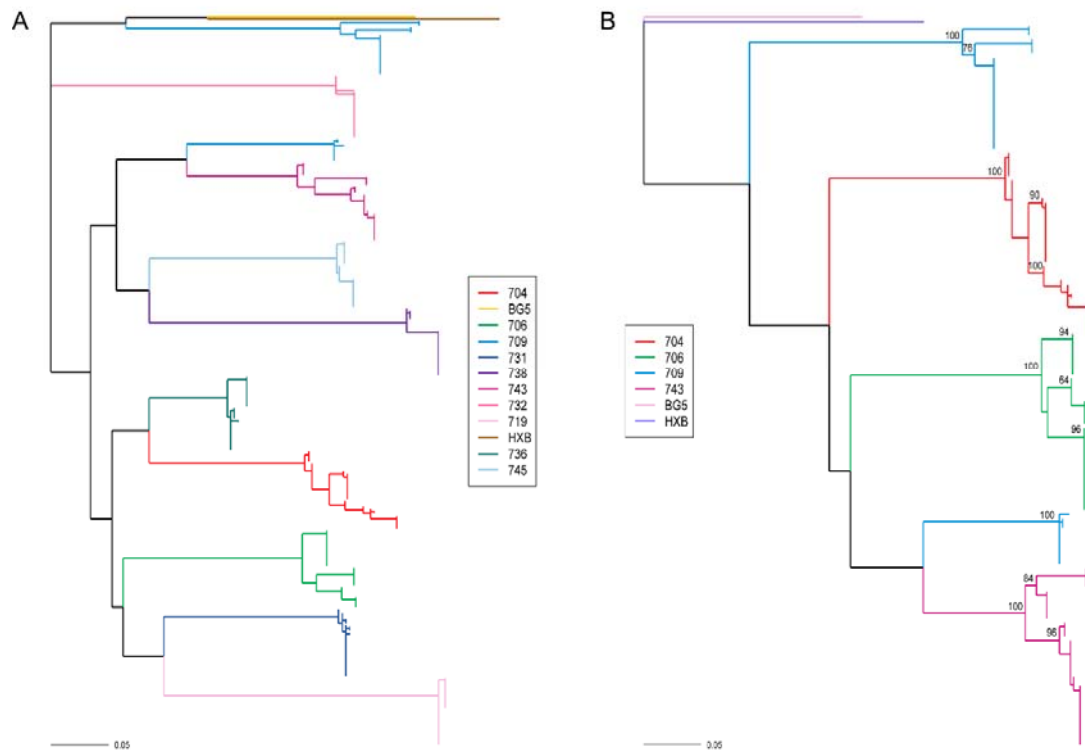

516

517 **Fig. 3 – Multivariant infection in infants with elite plasma neutralizing activity.** (A) Maximum-  
518 likelihood tree of env SGA amplicons (V2C5 region, HXB2 position 6690 – 7757) of circulating viral  
519 variants from infants with elite and broad plasma neutralizing activity. BG505.W6M.C2 (Clade A,  
520 labelled BG5, yellow) and HXB2 (Clade B, labelled HXB, brown) were used as outgroups. Distinct  
521 multiple branches for AIIIMS704 (red), AIIIMS706 (green) AIIIMS709 (blue), and AIIIMS743 (deep pink)  
522 were observed. (B) Maximum-likelihood tree of full length env sequences (HXB2 position 6225 –  
523 8795) from the four elite neutralizers (AIIIMS704, red; AIIIMS706, green; AIIIMS709, blue; and  
524 AIIIMS743, deep pink). BG505.W6M.C2 (Clade A, labelled BG5, light pink) and HXB2 (Clade B, labelled  
525 HXB, purple) were used as outgroups. The numerals at the node represent bootstrap value. The  
526 horizontal scale bar represents genetic distance. nt, nucleotide.

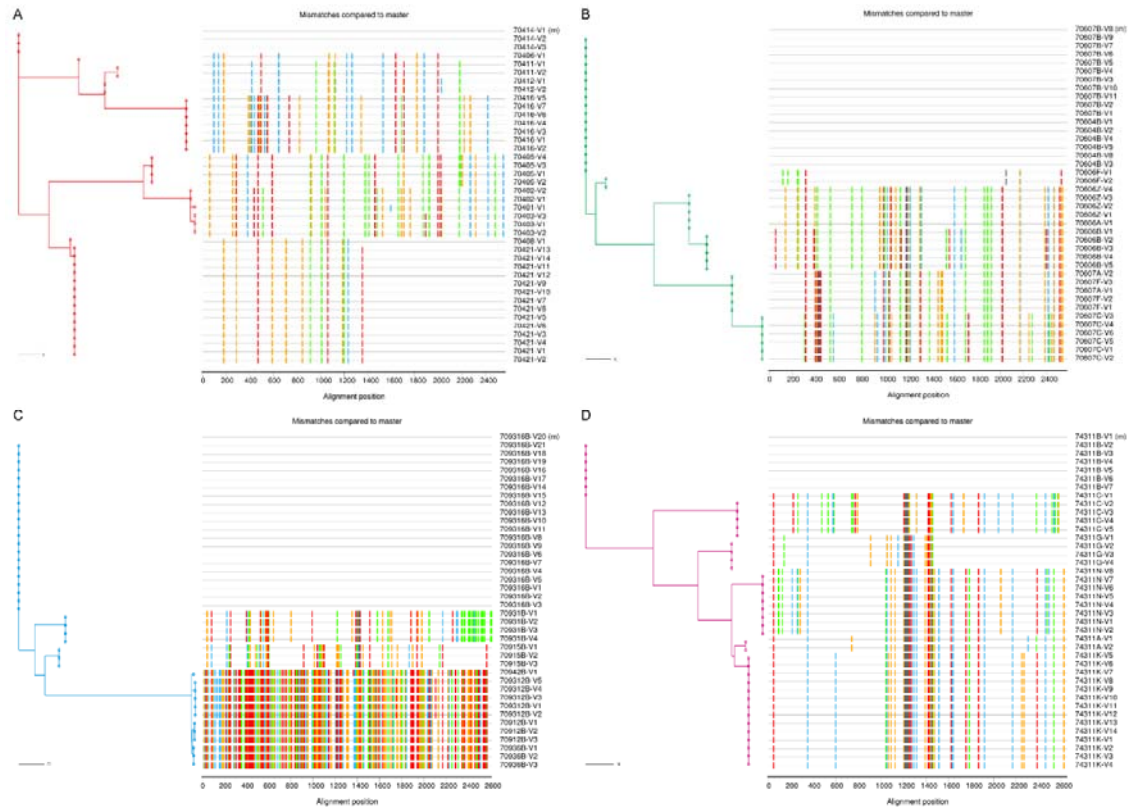

527

528 **Fig. 4 – Distinct circulating viral variants in infant elite neutralizers.** (A – D) Highlighter plots with  
529 maximum-likelihood trees of 40 SGA env sequences from each infant suggests productive infection  
530 with more than 2 distinct viruses. Maximum-likelihood trees are color coded (AIIMS704 – red,  
531 AIIMS706 – Green, AIIMS709 – Blue and AIIMS743 – Deep pink). Colored hash marks on each  
532 highlighter plot represent nucleotide difference (A – green; T – red, C – blue, and G – orange)  
533 compared to the sequence at the top of the plot. The horizontal scale bar represents genetic  
534 distance. nt, nucleotide.

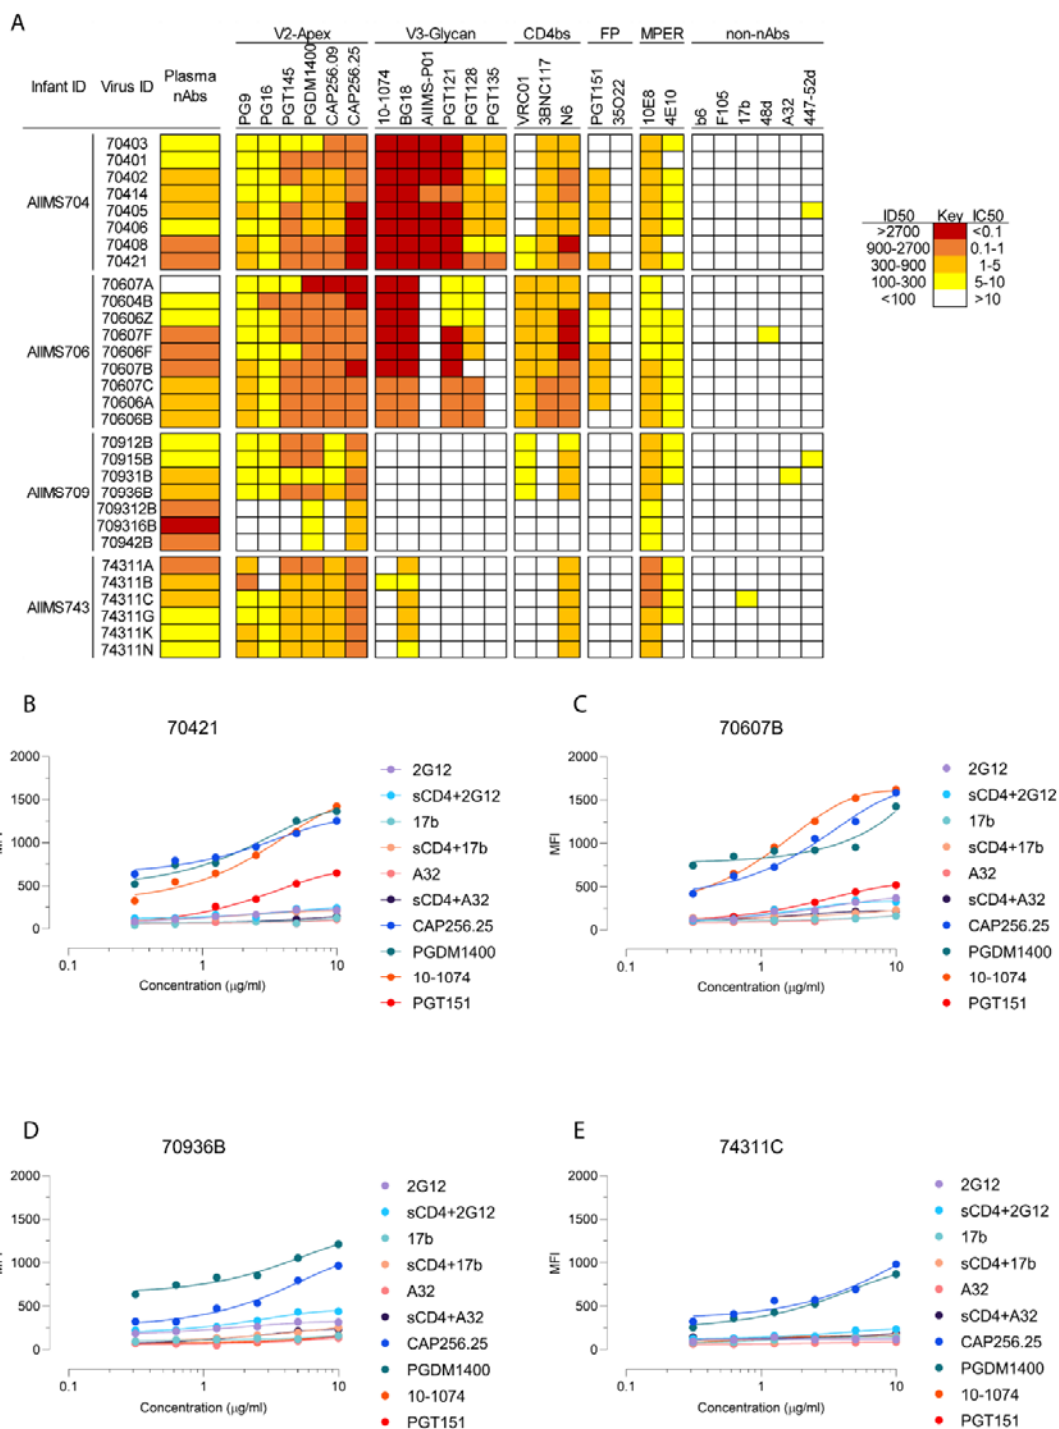

535

536 **Fig. 5 –Neutralization profile and antigenic characteristics of pseudoviruses from infant elite**  
 537 **neutralizers.** (A) Neutralization susceptibility of circulating viruses from elite neutralizers to  
 538 autologous plasma nAbs and known bnAbs was assessed using TZM-bl cells. The potency of plasma  
 539 and bnAbs is color coded per the key given. Most potent neutralization was seen with V2-apex  
 540 targeting bnAbs. (B – E) Surface binding assay with varying concentration of trimer specific V2-apex  
 541 targeting bnAbs (PGDM1400, CAP256.25), V3-glycan targeting bnAb 10-1074, gp120-gp41 interface  
 542 targeting bnAb PGT151, CD4-induced nnAbs (17b and A32, in presence and absence of sCD4), and

543 gp120 outer domain targeting bnAb (2G12, in presence and absence of sCD4). All binding  
544 experiments were repeated thrice, and shown are the average MFI values. MFI, mean fluorescence  
545 intensity.

| Infant_ID | Neutralization Category | CD4 Count | Plasma Viral Load (Log) | SGA Amplicons (n) | Sex | Circulating Variant | env gene diversity | env divergence |
|-----------|-------------------------|-----------|-------------------------|-------------------|-----|---------------------|--------------------|----------------|
| AiIMS704  | Elite                   | 2592      | 5.59                    | 41                | M   | 4                   | 2.5 (0.6-3.2)      | 0.026          |
| AiIMS706  | Elite                   | 1652      | 5.62                    | 40                | M   | 3                   | 2.4 (0.4-3.6)      | 0.029          |
| AiIMS709  | Elite                   | 2142      | 5.33                    | 40                | M   | 4                   | 15.1 (0.4-16.6)    | 0.097          |
| AiIMS743  | Elite                   | 1540      | 5.81                    | 40                | M   | 4                   | 2.6 (0.4-3.5)      | 0.022          |
| AiIMS731  | Broad                   | 1228      | 5.62                    | 35                | M   | 1                   | 0.6 (0.1-1.5)      | 0.002          |
| AiIMS719  | Broad                   | 1634      | 5.07                    | 35                | F   | 1                   | 0.3 (0.1-0.7)      | 0.004          |
| AiIMS736  | Broad                   | 2105      | 6.04                    | 37                | F   | 1                   | 0.6 (0.6-1.2)      | 0.002          |
| AiIMS744  | Broad                   | 2595      | 5.89                    | 38                | M   | 1                   | 0.6 (0.2-1.1)      | 0.002          |
| AiIMS732  | Broad                   | 1698      | 6.31                    | 35                | M   | 1                   | 0.7 (0.6-1.3)      | 0.003          |
| AiIMS738  | Broad                   | 1642      | 4.59                    | 36                | M   | 1                   | 0.6 (0.3-0.77)     | 0.003          |

546

547 **Table 1 – HIV-1 env analysis of infant elite and broad neutralizers.** Circulating variants were  
548 estimated based on highlighter and bootstrapped neighbour-joining trees (Figure 3A – B and Figure  
549 4A – D). env divergence (average evolutionary divergence) among SGA amplicons for each infant was  
550 measured as the number of base substitutions per site from averaging over all sequence pairs within  
551 each group. env diversity (mean genetic distance) for each infant is shown as median with range,  
552 median (range). M – male, F – female.

553

554 **Supplementary Materials**

A

| Infant ID | Age (M) | C     |       |      |       |           |       |      |           | % Breadth | Geometric Mean Titres |
|-----------|---------|-------|-------|------|-------|-----------|-------|------|-----------|-----------|-----------------------|
|           |         | 25710 | 25711 | 1428 | 16055 | 330.16.E6 | SV21A | ST5B | 329.14.B1 |           |                       |
| AIIMS704  | 12      | 324   | 321   | 216  | 162   | 221       | 314   | 297  | 201       | 100       | 250                   |
| AIIMS706  | 9       | 209   | 189   | 254  | 138   | 152       | 369   | 164  | 164       | 100       | 195                   |
| AIIMS709  | 14      | 244   | 281   | 331  | 134   | 224       | 101   | 201  | 171       | 100       | 192                   |
| AIIMS743  | 14      | 357   | 227   | 291  | 113   | 247       | 101   | 252  | 204       | 100       | 207                   |
| AIIMS731  | 9       | 268   | 86    | 124  | 61    | 89        | 97    | 249  | 249       | 100       | 135                   |
| AIIMS719  | 12      | 321   | 310   | 258  | 136   | 112       | 164   | 102  | 118       | 100       | 178                   |
| AIIMS736  | 9       | 421   | 160   | 235  | 103   | 214       | <50   | <50  | 150       | 75        | 193                   |
| AIIMS744  | 14      | 297   | 89    | 103  | 117   | 144       | 118   | <50  | 161       | 88        | 136                   |
| AIIMS732  | 7       | 112   | 110   | 259  | 141   | 137       | 132   | 94   | 112       | 100       | 139                   |
| AIIMS738  | 11      | 128   | <50   | <50  | 84    | 163       | 102   | 149  | 114       | 75        | 120                   |
| AIIMS721  | 24      | 181   | 66    | 114  | 88    | 162       | 164   | <50  | 87        | 87        | 116                   |
| AIIMS703  | 9       | 114   | 247   | 88   | 74    | 84        | 78    | <50  | 86        | 87        | 100                   |
| AIIMS705  | 6       | 158   | 87    | 118  | 72    | 87        | 81    | <50  | <50       | 75        | 97                    |
| AIIMS707  | 24      | 126   | 176   | <50  | <50   | <50       | 91    | 146  | <50       | 50        | 131                   |
| AIIMS733  | 12      | 254   | <50   | 177  | <50   | 264       | <50   | <50  | <50       | 38        | 228                   |
| AIIMS742  | 19      | 114   | <50   | 247  | 89    | 110       | <50   | <50  | 58        | 63        | 110                   |
| AIIMS716  | 24      | 102   | <50   | <50  | <50   | 156       | 64    | <50  | <50       | 38        | 101                   |
| AIIMS720  | 9       | 135   | <50   | <50  | <50   | 77        | 91    | <50  | <50       | 38        | 98                    |
| AIIMS702  | 24      | 89    | <50   | 147  | <50   | 88        | 82    | <50  | <50       | 50        | 99                    |
| AIIMS727  | 8       | 112   | 157   | 88   | <50   | 105       | <50   | <50  | <50       | 50        | 113                   |
| AIIMS735  | 8       | 118   | 138   | 68   | <50   | 98        | <50   | <50  | <50       | 50        | 102                   |
| AIIMS741  | 9       | 186   | <50   | 214  | <50   | 88        | <50   | <50  | <50       | 38        | 152                   |
| AIIMS711  | 7       | 174   | <50   | 152  | 64    | <50       | 74    | <50  | <50       | 50        | 106                   |
| AIIMS717  | 8       | 115   | 97    | <50  | 86    | <50       | <50   | <50  | <50       | 38        | 99                    |
| AIIMS718  | 11      | 116   | <50   | 73   | 89    | <50       | <50   | <50  | <50       | 38        | 91                    |
| AIIMS712  | 19      | 89    | <50   | 141  | <50   | <50       | <50   | <50  | <50       | 25        | 112                   |
| AIIMS737  | 8       | 76    | <50   | 186  | <50   | <50       | <50   | <50  | <50       | 25        | 119                   |
| AIIMS747  | 7       | 78    | <50   | <50  | <50   | <50       | <50   | <50  | <50       | 13        | 78                    |
| AIIMS713  | 12      | 91    | <50   | 86   | <50   | <50       | <50   | <50  | <50       | 25        | 88                    |
| AIIMS715  | 8       | 98    | 74    | <50  | <50   | <50       | <50   | <50  | <50       | 25        | 85                    |
| AIIMS701  | 24      | 91    | <50   | <50  | <50   | <50       | <50   | <50  | <50       | 13        | 91                    |
| AIIMS722  | 13      | 98    | <50   | <50  | <50   | <50       | <50   | <50  | <50       | 13        | 98                    |
| AIIMS723  | 12      | 89    | <50   | <50  | <50   | <50       | <50   | <50  | <50       | 13        | 89                    |
| AIIMS724  | 14      | 78    | <50   | <50  | <50   | <50       | <50   | <50  | <50       | 13        | 78                    |
| AIIMS726  | 18      | 67    | <50   | <50  | <50   | <50       | <50   | <50  | <50       | 13        | 67                    |
| AIIMS708  | 18      | <50   | <50   | <50  | <50   | <50       | <50   | <50  | <50       | 0         | 0                     |
| AIIMS714  | 20      | <50   | <50   | <50  | <50   | <50       | <50   | <50  | <50       | 0         | 0                     |
| AIIMS710  | 6       | <50   | <50   | <50  | <50   | <50       | <50   | <50  | <50       | 0         | 0                     |
| AIIMS725  | 9       | <50   | <50   | <50  | <50   | <50       | <50   | <50  | <50       | 0         | 0                     |
| AIIMS728  | 8       | <50   | <50   | <50  | <50   | <50       | <50   | <50  | <50       | 0         | 0                     |
| AIIMS729  | 14      | <50   | <50   | <50  | <50   | <50       | <50   | <50  | <50       | 0         | 0                     |
| AIIMS730  | 18      | <50   | <50   | <50  | <50   | <50       | <50   | <50  | <50       | 0         | 0                     |
| AIIMS748  | 9       | <50   | <50   | <50  | <50   | <50       | <50   | <50  | <50       | 0         | 0                     |
| AIIMS734  | 24      | <50   | <50   | <50  | <50   | <50       | <50   | <50  | <50       | 0         | 0                     |
| AIIMS739  | 17      | <50   | <50   | <50  | <50   | <50       | <50   | <50  | <50       | 0         | 0                     |
| AIIMS740  | 24      | <50   | <50   | <50  | <50   | <50       | <50   | <50  | <50       | 0         | 0                     |
| AIIMS746  | 24      | <50   | <50   | <50  | <50   | <50       | <50   | <50  | <50       | 0         | 0                     |

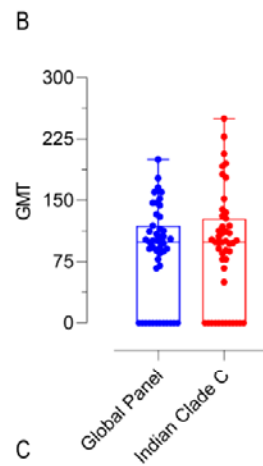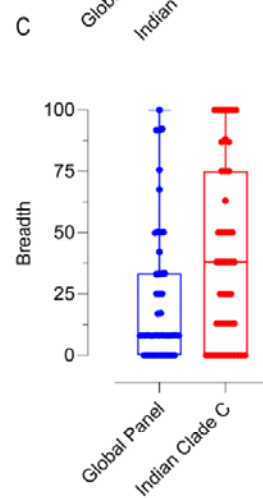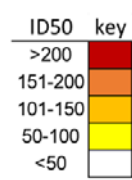

555

556 **Fig. S1 – Plasma Neutralization Activity of HIV-1 infected infants against viral isolates of Indian**  
 557 **origin.** (A) Heatmap representing HIV-1 specific neutralization titres (inverse plasma dilution) of  
 558 plasma nAbs from 47 infant samples against the 8-virus Indian clade C panel. ID50 values are color-  
 559 coded per the key given, with darker colors implying higher ID50 titres. (B and C) Comparison of  
 560 geometric mean titres and breadth (pseudoviruses showing >50% neutralization at 1/50 plasma

561 dilution) of infants with the 12-virus global panel and 8-virus Indian clade C panel. Data is shown as  
 562 median with range.

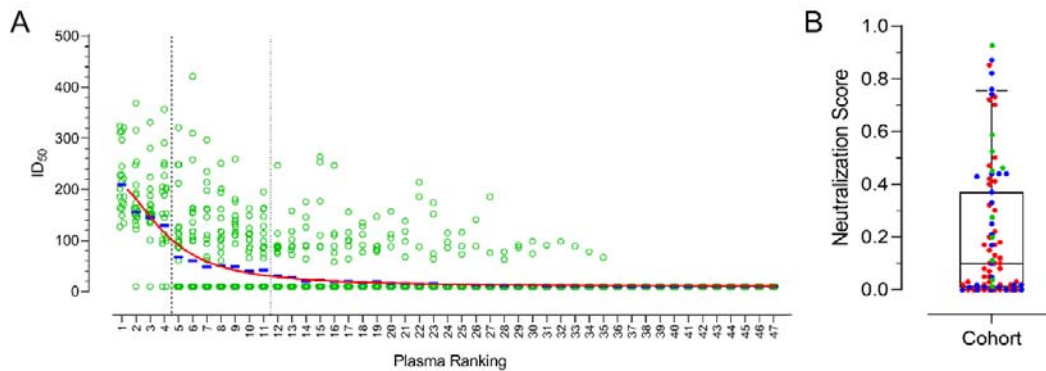

563

564 **Fig. S2 – Neutralization scores calculated based on modified breadth-potency matrix were**  
 565 **predictive of geometric mean titres.** (A) Infant plasmas are ranked based on geometric mean titres.  
 566 Green dots represent individual ID50 values against the 12-virus global panel, whereas the blue bar  
 567 represents geometric mean titres, red line shows non-linear curve fit of modified neutralization  
 568 score. Neutralization scores accurately predict geometric mean titres. (B) Validation of neutralization  
 569 score to predict elite and broad neutralizers (red – infants, blue – adolescents and green – adults).  
 570 Quartile distribution of neutralization scores show 75th percentile at a cut-off of 0.35 and 90th  
 571 percentile at 0.7. Elite neutralizers typically showed neutralization scores in the 90th percentile,  
 572 whereas broad neutralizers had a neutralization score in the range of 75th to 90th percentile.

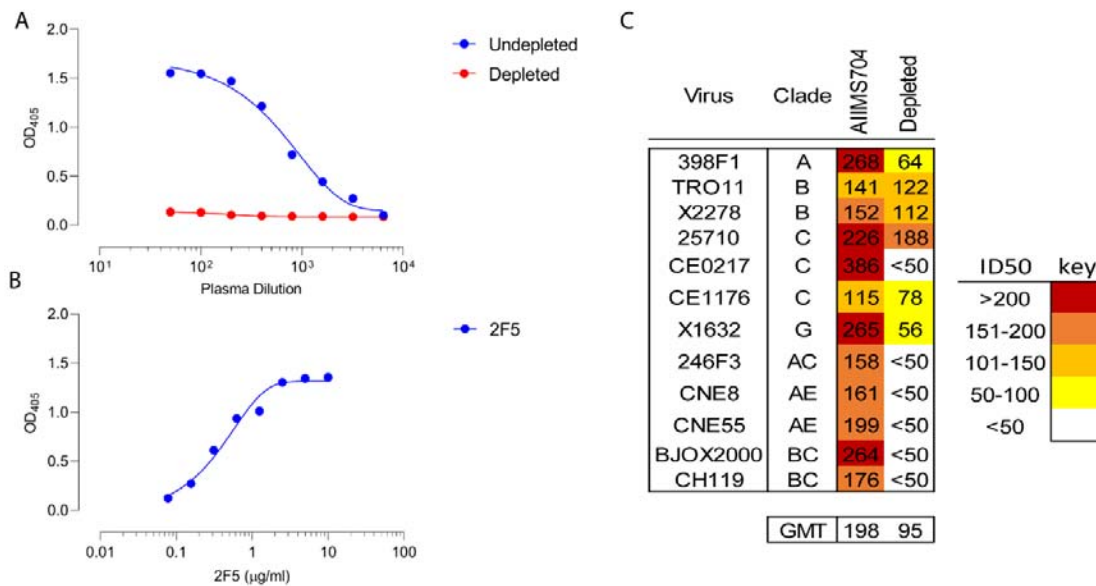

573

574 **Fig. S3 – AIIMS704 had MPER directed plasma bnAbs.** (A) Binding ELISA against MPER-C peptide  
 575 using undepleted and MPER-C depleted AIIMS704 plasma showed efficient adsorption and depletion  
 576 of anti-MPER plasma bnAbs. (B) 2F5, an anti-MPER bnAb was used as positive control. (C) ID50  
 577 values of AIIMS704 undepleted and MPER-C depleted plasma against the 12-virus global panel.  
 578 MPER depletion resulted in 2-fold reduction in GMT titres.



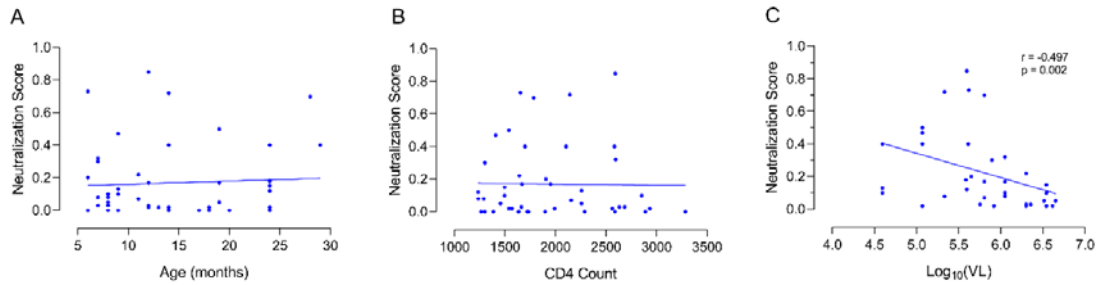

579

580 **Fig. S4 – Influence of host and viral parameter on neutralization breadth.** Correlation between (A)  
 581 duration of infection, (B) CD4 T-cell counts and (C) viral load with neutralization scores for infants  
 582 with discernible neutralization activity. Infants that showed no neutralization against the 12-virus  
 583 global panel were excluded from analysis.

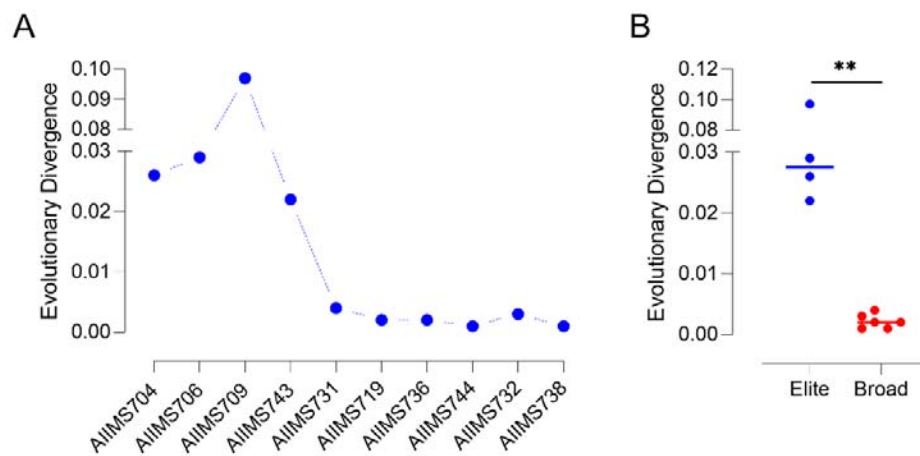

584

585 **Fig. S5 – Viral population in infant elite neutralizers is highly divergent.** (A) Average evolutionary  
 586 divergence (nucleotide substitutions per site) among SGA amplicons for infant elite and broad  
 587 neutralizers. The number of base substitutions per site from averaging over all sequence pairs within  
 588 each group are shown. Analyses were conducted using the Maximum Composite Likelihood model  
 589 [1]. The rate variation among sites was modelled with a gamma distribution (shape parameter = 5).  
 590 (B) Statistical comparison between elite and broad neutralizers was conducted by Mann Whitney U  
 591 test. \*\* represent a p-value of 0.0095.

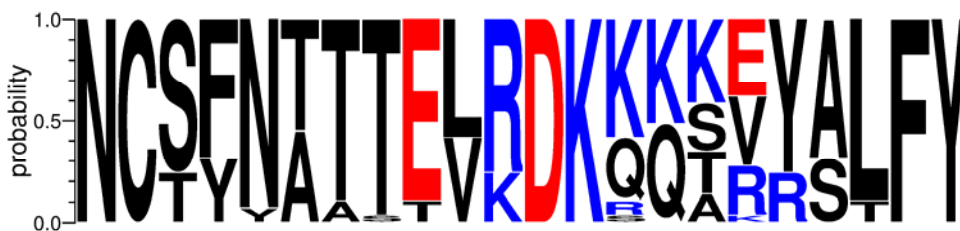

592

593 **Fig. S6 – Frequency plot of the V2-loop sequences of infant elite neutralizers.** Weblogo plot  
 594 showing the amino acid frequency plots of V2-loop (HXB2 amino acids 156 – 177) from SGA  
 595 amplicons of elite neutralizers. Key glycan (N156 and N160) were well-conserved.

| Neutralization | Score | Infants |
|----------------|-------|---------|
|----------------|-------|---------|



| Category     |         | N (%)      |
|--------------|---------|------------|
| Elite        | 0.7-1   | 4 (8.51)   |
| Broad        | 0.3-0.7 | 6 (12.27)  |
| Cross        | 0.1-0.3 | 9 (19.15)  |
| Weak or none | <0.1    | 28 (59.57) |

596

597 **Table S1 – Categorization of infants with varied viral neutralization activity.** Neutralization  
 598 categories were defined based on normalized neutralization score against the 12-virus global panel.  
 599 Scores of  $\geq 0.7$  were predictive of elite neutralization activity, scores in the range of 0.3 to 0.7 were  
 600 predictive of broad neutralization activity, and scores in the range of 0.1 to 0.3 were predictive of  
 601 cross neutralization activity. N = number of infants.

| Infant ID | Clone ID | SGA Clones (Number) |
|-----------|----------|---------------------|
| AIIMS704  | 70401    | 1                   |
|           | 70402    | 2                   |
|           | 70403    | 3                   |
|           | 70405    | 4                   |
|           | 70406    | 1                   |
|           | 70408    | 1                   |
|           | 70411    | 2                   |
|           | 70412    | 2                   |
|           | 70414    | 3                   |
|           | 70416    | 7                   |
| 70421     | 14       |                     |
| AIIMS706  | 70607A   | 2                   |
|           | 70604B   | 6                   |
|           | 70606Z   | 4                   |
|           | 70607F   | 3                   |
|           | 70606F   | 2                   |
|           | 70607B   | 11                  |
|           | 70607C   | 6                   |
|           | 70606A   | 1                   |
|           | 70606B   | 5                   |
| AIIMS709  | 70912B   | 3                   |
|           | 70915B   | 3                   |
|           | 70931B   | 4                   |
|           | 70936B   | 3                   |
|           | 709312B  | 5                   |
|           | 709316B  | 21                  |
|           | 70942B   | 1                   |
| AIIMS719  | 71901A   | 2                   |
|           | 71904B   | 9                   |
|           | 71904D   | 16                  |

|          |        |    |
|----------|--------|----|
|          | 71905G | 1  |
|          | 71906F | 7  |
| AIMS731  | 73105B | 4  |
|          | 73105C | 3  |
|          | 73105H | 14 |
|          | 73106B | 2  |
|          | 73106F | 13 |
|          | 73106G | 3  |
| AIIMS732 | 73201A | 3  |
|          | 73201B | 1  |
|          | 73201C | 24 |
|          | 73201D | 4  |
| AIIMS736 | 73601A | 11 |
|          | 73604D | 16 |
|          | 73602H | 2  |
|          | 73603B | 3  |
|          | 73603D | 6  |
| AIIMS738 | 73801A | 1  |
|          | 73801B | 5  |
|          | 73801C | 24 |
|          | 73801D | 5  |
| AIIMS743 | 74311A | 2  |
|          | 74311B | 7  |
|          | 74311C | 5  |
|          | 74311G | 4  |
|          | 74311K | 14 |
|          | 74311N | 8  |
| AIIMS744 | 74401A | 8  |
|          | 74401C | 5  |
|          | 74401F | 4  |
|          | 74402D | 11 |
|          | 74402E | 2  |

602 **Table S2 – Population frequency of SGA env amplicons from infant elite and broad neutralizers.**
